# Supplementary material
Source: HighWire-hosted journal article supplement (http://qshc.bmj.com/highwire/filestream/147174/field_highwire_adjunct_files/0/35253_Appendix_2_-_Quality_Scoring_Criteria.pdf)
Supplement: 35253_Appendix_2_-_Quality_Scoring_Criteria.pdf [file 35253_Appendix_2_-_Quality_Scoring_Criteria.pdf]

## Appendix 2 – Quality Scoring Guidelines

| Criteria                                                       | 0 = Not at all            | 1 = Very slightly                                                                                                         | 2 = Moderately                                                                                                                         | 3 = Complete                                                                                                                                                          |
|----------------------------------------------------------------|---------------------------|---------------------------------------------------------------------------------------------------------------------------|----------------------------------------------------------------------------------------------------------------------------------------|-----------------------------------------------------------------------------------------------------------------------------------------------------------------------|
| <b>Explicit theoretical framework</b>                          | <i>No mention at all.</i> | <i>Reference to broad theoretical basis.</i>                                                                              | <i>Reference to a specific theoretical basis.</i>                                                                                      | <i>Explicit statement of theoretical framework and/or constructs applied to the research.</i>                                                                         |
| <b>Statement of aims/objectives in main body of report</b>     |                           | <i>General reference to aim/objective at some point in the report.</i>                                                    | <i>Reference to broad aims/objectives in main body of report.</i>                                                                      | <i>Explicit statement of aims/objectives in main body of report.</i>                                                                                                  |
| <b>Clear description of research setting</b>                   |                           | <i>General description of research area and background e.g. ‘in primary care’.</i>                                        | <i>General description of research problem in the target population e.g. ‘amongst GPs in primary care’.</i>                            | <i>Specific description of the research problem and target population in the context of the study e.g. nurses and doctors from GP practices in the east midlands.</i> |
| <b>Evidence of sample size considered in terms of analysis</b> |                           | <i>Basic explanation for choice of sample size. Evidence that size of the sample has been considered in study design.</i> | <i>Evidence of consideration of sample size in terms of saturation/ information redundancy or to fit generic analytic requirements</i> | <i>Explicit statement of data being gathered until information redundancy/ saturation was reached or to fit exact calculations for analytic requirements</i>          |

|                                                                   |                                      |                                                                                                                     |                                                                                                                                                                                                                                          |                                                                                                                                                                                                                                               |
|-------------------------------------------------------------------|--------------------------------------|---------------------------------------------------------------------------------------------------------------------|------------------------------------------------------------------------------------------------------------------------------------------------------------------------------------------------------------------------------------------|-----------------------------------------------------------------------------------------------------------------------------------------------------------------------------------------------------------------------------------------------|
| <b>Representative sample of target group of a reasonable size</b> | <i>No statement of target group.</i> | <i>Sample is limited but represents some of the target group or representative but very small.</i>                  | <i>Sample is somewhat diverse but not entirely representative e.g. inclusive of all age groups, experience but only 1 workplace. Requires discussion of target population to determine what sample is required to be representative.</i> | <i>Sample includes individuals to represent a cross-section of the target population, considering factors such as experience, age, and workplace.</i>                                                                                         |
| <b>Description of procedure for data collection</b>               |                                      | <i>Very basic and brief outline of data collection procedure e.g. 'using a questionnaire distributed to staff'.</i> | <i>States each stage of data collection procedure but with limited detail, or states some stages in details but omits others.</i>                                                                                                        | <i>Detailed description of each stage of the data collection procedure, including when, where and how data was gathered.</i>                                                                                                                  |
| <b>Rationale for choice of data collection tool(s)</b>            |                                      | <i>Very limited explanation for choice of data collection tool(s).</i>                                              | <i>Basic explanation of rationale for choice of data collection tool(s) e.g. based on use in a prior similar study.</i>                                                                                                                  | <i>Detailed explanation of rationale for choice of data collection tool(s) e.g. relevance to the study aims and assessments of tool quality either statistically e.g. for reliability &amp; validity, or relevant qualitative assessment.</i> |

|                                                                                                                                      |                                     |                                                                                                                  |                                                                                                                                                                                          |                                                                                                                                                                                    |
|--------------------------------------------------------------------------------------------------------------------------------------|-------------------------------------|------------------------------------------------------------------------------------------------------------------|------------------------------------------------------------------------------------------------------------------------------------------------------------------------------------------|------------------------------------------------------------------------------------------------------------------------------------------------------------------------------------|
| <b>Detailed recruitment data</b>                                                                                                     | <i>No research question stated.</i> | <i>Minimal recruitment data e.g. no of questionnaire sent and no. returned.</i>                                  | <i>Some recruitment information but not complete account of the recruitment process e.g. recruitment figures but no information on strategy used.</i>                                    | <i>Complete data regarding no. approached, no. recruited, attrition data where relevant, method of recruitment.</i>                                                                |
| <b>Statistical assessment of reliability and validity of measurement tool(s)<br/>(Quantitative only)</b>                             |                                     | <i>Reliability and validity of measurement tool(s) discussed, but not statistically assessed.</i>                | <i>Some attempt to assess reliability and validity of measurement tool(s) but insufficient e.g. attempt to establish test-retest reliability is unsuccessful but no action is taken.</i> | <i>Suitable and thorough statistical assessment of reliability and validity of measurement tool(s) with reference to the quality of evidence as a result of the measures used.</i> |
| <b>Fit between stated research question and method of data collection<br/>(Quantitative)</b>                                         |                                     | <i>Method of data collection can only address some aspects of the research question.</i>                         | <i>Method of data collection can address the research question but there is a more suitable alternative that could have been used or used in addition.</i>                               | <i>Method of data collection selected is the most suitable approach to attempt answer the research question</i>                                                                    |
| <b>Fit between stated research question and format and content of data collection tool e.g. interview schedule<br/>(Qualitative)</b> |                                     | <i>Structure and/or content only suitable to address the research question in some aspects or superficially.</i> | <i>Structure &amp; content allows for data to be gathered broadly addressing the stated research question(s) but could benefit from greater detail.</i>                                  | <i>Structure &amp; content allows for detailed data to be gathered around all relevant issues required to address the stated research question(s).</i>                             |

|                                                                                |  |                                                                                                       |                                                                                                                                                                             |                                                                                                                                      |
|--------------------------------------------------------------------------------|--|-------------------------------------------------------------------------------------------------------|-----------------------------------------------------------------------------------------------------------------------------------------------------------------------------|--------------------------------------------------------------------------------------------------------------------------------------|
| <b>Fit between research question and method of analysis<br/>(Quantitative)</b> |  | <i>Method of analysis can only address the research question basically or broadly.</i>                | <i>Method of analysis can address the research question but there is a more suitable alternative that could have been used or used in addition to offer greater detail.</i> | <i>Method of analysis selected is the most suitable approach to attempt answer the research question in detail.</i>                  |
| <b>Good justification for analytic method selected</b>                         |  | <i>Basic explanation for choice of analytic method</i>                                                | <i>Fairly detailed explanation of choice of analytic method.</i>                                                                                                            | <i>Detailed explanation for choice of analytic method based on nature of research question(s)</i>                                    |
| <b>Assessment of reliability of analytic process<br/>(Qualitative only)</b>    |  | <i>More than 1 researcher involved in the analytic process but no further reliability assessment.</i> | <i>Limited attempt to assess reliability e.g. reliance on one method.</i>                                                                                                   | <i>Use of a range of methods to assess reliability e.g. triangulation, multiple researchers, varying research backgrounds.</i>       |
| <b>Evidence of user involvement in design</b>                                  |  | <i>Use of pilot study but no involvement in planning stages of study design.</i>                      | <i>Pilot study with feedback from users informing changes to the design.</i>                                                                                                | <i>Explicit consultation with steering group or statement or formal consultation with users in planning of study design.</i>         |
| <b>Strengths and limitations critically discussed</b>                          |  | <i>Very limited mention of strengths and limitations with omissions of many key issues.</i>           | <i>Discussion of some of the key strengths and weaknesses of the study but not complete.</i>                                                                                | <i>Discussion of strengths and limitations of all aspects of study including design, measures, procedure, sample &amp; analysis.</i> |
